# Supplementary material for: Camouflage and Clutch Survival in Plovers and Terns
Source: PubMed Central journal article supplement (PMC5018847; doi:10.1038/srep32059), 2016-09-12

## **Supplementary Information**

Stoddard, M. C. et al. Camouflage and Clutch Survival in Plovers and Terns. *Sci. Rep.* 6, 32059; doi: 10.1038/srep32059 (2016).

## **Camouflage and Clutch Survival in Plovers and Terns**

**Mary Caswell Stoddard<sup>1,2</sup>, Krisztina Kupán<sup>3</sup>, Harold N. Eyster<sup>2</sup>, Wendoly Rojas-Abreu<sup>4</sup>, Medardo Cruz-López<sup>5</sup>, Martín Alejandro Serrano-Meneses<sup>4,6</sup> & Clemens Küpper<sup>3</sup>**

<sup>1</sup>Department of Ecology and Evolutionary Biology, Princeton University, Princeton, NJ 08544, USA. <sup>2</sup>Museum of Comparative Zoology, Department of Organismic and Evolutionary Biology, Harvard University, Cambridge, MA 02138, USA. <sup>3</sup>Institute of Zoology, University of Graz, Universitätsplatz 2, 8010 Graz, Austria. <sup>4</sup>Laboratorio de Biología Evolutiva, Centro Tlaxcala de Biología de la Conducta, Universidad Autónoma de Tlaxcala, Carretera Tlaxcala-Puebla km 1.5, 90070, Tlaxcala, México. <sup>5</sup>Posgrado en Ciencias del Mar y Limnología, Universidad Nacional Autónoma de México, Unidad Académica Mazatlán, Av. Joel Montes Camarena S/N, 82040, Mazatlán, Sinaloa, México. <sup>6</sup>Posgrado en Ciencias Biológicas, Universidad Autónoma de Tlaxcala, México

Correspondence and requests for materials should be addressed to M.C.S. (email: [mstoddard@princeton.edu](mailto:mstoddard@princeton.edu))

**Table S1.** Egg color and pattern characteristics of Least Tern and Snowy Plover clutches. Significant differences are in bold.

| Variable                       |   | Least Tern (N=24) | Snowy Plover (N=30) | t    | p           |
|--------------------------------|---|-------------------|---------------------|------|-------------|
| Mean Lab of the eggs           | L | 58.1 ± 7.5        | 55.4 ± 7.7          | -1.3 | 0.20        |
|                                | a | 3.2 ± 1.6         | 2.4 ± 1.2           | -2.2 | <b>0.04</b> |
|                                | b | 12.0 ± 2.9        | 12.5 ± 2.4          | 0.6  | 0.55        |
| Lab of the egg background only | L | 63.7 ± 7.7        | 60.5 ± 8.3          | -1.4 | 0.16        |
|                                | a | 2.3 ± 1.8         | 1.7 ± 1.3           | -1.7 | 0.10        |
|                                | b | 12.5 ± 3.3        | 13.4 ± 3.1          | 1.0  | 0.31        |
| Lab the egg maculation only    | L | 43.8 ± 9.1        | 38.7 ± 11.3         | -1.8 | 0.08        |
|                                | a | 5.3 ± 1.9         | 4.7 ± 2.3           | -1.4 | 0.18        |
|                                | b | 10.5 ± 2.4        | 9.2 ± 2.9           | -1.8 | 0.07        |
| Proportion of maculation       |   | 0.3 ± 0.2         | 0.3 ± 0.1           | -1.2 | 0.24        |

**Figure S1.** Average reflectance spectra for Snowy Plover (n = 12 eggs from 4 clutches) and Least Tern eggs (n = 6 eggs from 3 clutches).

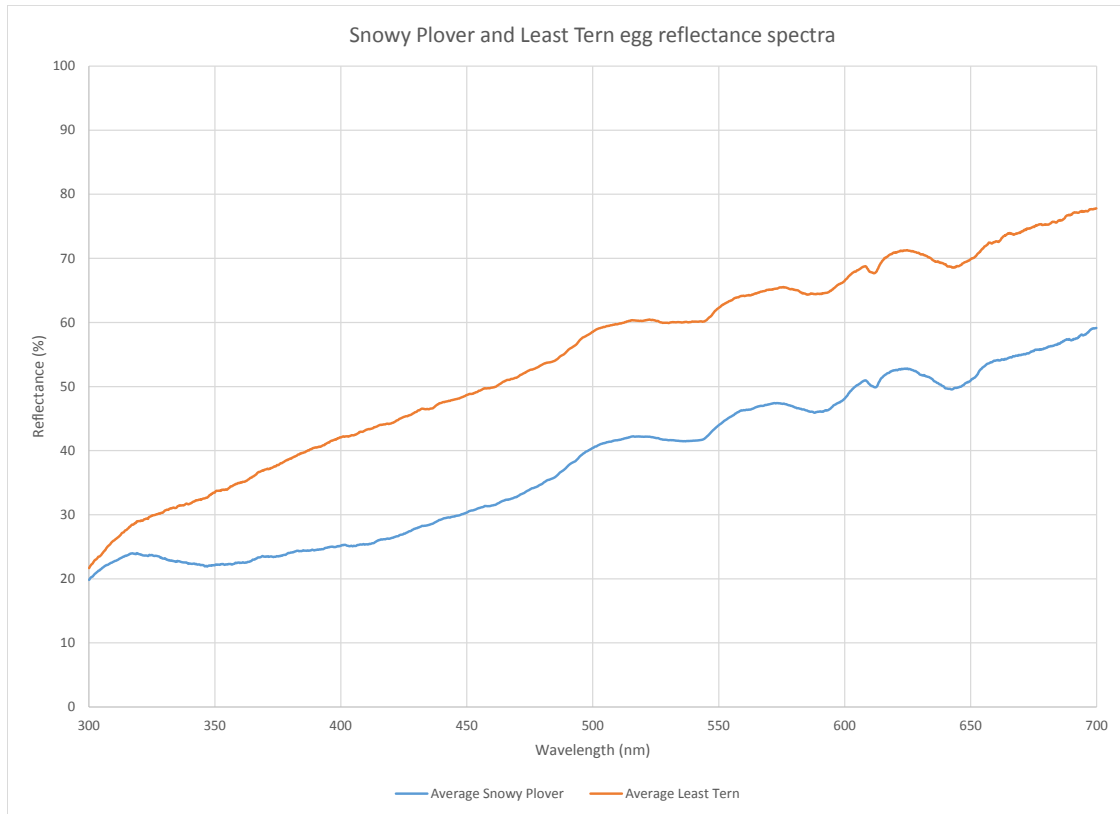

Supplement: srep32059-s1.pdf [file srep32059-s1.pdf]
